# Supplementary material for: Nutrient patterns and mortality: Results from the Japan Multi-Institutional Collaborative Cohort (J-MICC) Study
Source: Research Square preprint supplement (doi:10.21203/rs.3.rs-6631155/v1), 2025-08-27
Supplement: Supplementary file 1 [file 4f7b10ba4ebb08dadf3806b7.docx]

| **Supplementary Table 1. Factor loading matrix for selected nutrient patterns** | | | | |
| --- | --- | --- | --- | --- |
| Nutrients | Factor 1 | Factor 2 | Factor 3 | Factor 4 |
| Folate | 0.89 | 0.16 | 0.08 | 0.11 |
| Carotene | 0.85 | 0.24 | 0.05 | 0.08 |
| Insoluble dietary fiber | 0.83 | 0.20 | 0.12 | 0.24 |
| Vitamin C | 0.79 | 0.10 | 0.07 | 0.18 |
| Potassium | 0.75 | 0.14 | 0.26 | 0.25 |
| Soluble dietary fiber | 0.75 | 0.15 | 0.09 | 0.42 |
| Iron | 0.71 | 0.14 | 0.06 | 0.52 |
| Retinol | 0.69 | 0.20 | 0.14 | 0.01 |
| Monounsaturated fatty acids | 0.16 | 0.93 | 0.19 | 0.01 |
| n-3 polyunsaturated fatty acids | 0.19 | 0.83 | 0.10 | 0.30 |
| n-6 polyunsaturated fatty acids | 0.26 | 0.80 | 0.03 | 0.17 |
| Vitamin E | 0.54 | 0.78 | 0.10 | 0.04 |
| Vitamin B1 | 0.03 | 0.50 | 0.36 | 0.33 |
| Cholesterol | 0.08 | 0.37 | 0.31 | 0.33 |
| Saturated fatty acids | 0.18 | 0.18 | 0.88 | 0.06 |
| Calcium | 0.43 | -0.06 | 0.70 | 0.28 |
| Vitamin B2 | 0.50 | 0.02 | 0.67 | 0.29 |
| Carbohydrate | 0.15 | -0.28 | -0.66 | 0.12 |
| Sodium | 0.26 | 0.08 | -0.02 | 0.78 |
| Protein | 0.23 | 0.37 | 0.48 | 0.65 |
| Vitamin D | 0.26 | 0.27 | 0.12 | 0.61 |
| Cumulative variance explained | 0.45 | 0.57 | 0.66 | 0.72 |
| Factor 1: folate, carotene, fiber, vitamin C, potassium, iron and retinol pattern Factor 2: unsaturated fatty acid and vitamin E pattern Factor 3: saturated fatty acid, calcium, vitamin B2 and low carbohydrate pattern Factor 4: sodium, protein and vitamin D pattern | | | | |
|  |
|  |
|  |

| **Supplementary Table 2. Quartile values of nutrient patterns** | |  |
| --- | --- | --- |
| Nutritent Patterns | Median (25%, 75%) |  |
| Factor 1 | -0.06 (-0.69, 0.63) |  |
| Factor 2 | -0.08 (-0.71, 0.62) |  |
| Factor 3 | -0.08 (-0.72, 0.62) |  |
| Factor 4 | -0.01 (-0.65, 0.63) |  |
| Factor 1: folate, carotene, fiber, vitamin C, potassium, iron and retinol pattern Factor 2: unsaturated fatty acid and vitamin E pattern Factor 3: saturated fatty acid, calcium, vitamin B2 and low carbohydrate pattern Factor 4: sodium, protein and vitamin D pattern | | |
|  |
|  |
|  |

| **Supplementary Table 3. Characteristics of study participants according to quartiles of Factor 3** | | | | | |
| --- | --- | --- | --- | --- | --- |
|  | **Factor3** | | | |  |
|  | **Q1 (n=18234)** | **Q2 (n=18235)** | **Q3 (n=18236)** | **Q4 (n=18234)** | **P-value** |
|  |
| **Age(years)a** | 57.0(49.0, 63.0) | 56.0(48.0, 62.0) | 56.0(48.0, 63.0) | 55.0(47.0, 62.0) | <0.001 |  |
| **Exercise during leisure time**  **(MET-hours/week)a** | 4.7(0.0, 15.8) | 5.1(0.4, 17.0) | 6.0(0.4, 17.9) | 7.7(1.3, 20.0) | <0.001 |  |
| **Energy intake(kcal/day)a** | 1657.3(1477.4, 1904.4) | 1643.7(1468.1, 1889.0) | 1657.9(1499.7, 1882.6) | 1671.6(1495.8, 1882.1) | <0.001 |  |
| **BMI(kg/m²)a** | 22.9(20.9, 25.1) | 22.8(20.8, 24.9) | 22.6(20.7, 24.7) | 22.4(20.5, 24.4) | <0.001 |  |
| **Sexb** |  |  |  |  | <0.001 |  |
| **Male** | 9684(53.1) | 8493(46.6) | 7549(41.4) | 6206(34.0) |  |  |
| **Female** | 8550(46.9) | 9742(53.4) | 10687(58.6) | 12028(66.0) |  |  |
| **Smoking habitb** |  |  |  |  | <0.001 |  |
| **Current** | 3629(19.9) | 3481(19.1) | 2939(16.1) | 2677(14.7) |  |  |
| **Past** | 4312(23.7) | 4064(22.3) | 3786(20.8) | 3553(19.5) |  |  |
| **Non** | 10293(56.5) | 10690(58.6) | 11511(63.1) | 12004(65.8) |  |  |
| **Drinking habitb** |  |  |  |  | <0.001 |  |
| **Current** | 9235(50.7) | 10414(57.1) | 10077(55.3) | 10216(56.0) |  |  |
| **Past** | 561(3.1) | 376(2.1) | 370(2.0) | 381(2.1) |  |  |
| **Non** | 8438(46.3) | 7445(40.8) | 7789(42.7) | 7637(41.9) |  |  |
| **Education level(years)b** |  |  |  |  | <0.001 |  |
| **≤9** | 1663(9.1) | 1235(6.8) | 1111(6.1) | 867(4.8) |  |  |
| **10~15** | 8936(49.0) | 9246(50.7) | 9095(49.9) | 9209(50.5) |  |  |
| **≥16** | 3242(17.8) | 3571(19.6) | 3737(20.5) | 4050(22.2) |  |  |
| **Unknown** | 4393(24.1) | 4183(22.9) | 4293(23.5) | 4108(22.5) |  |  |
| **Research siteb** |  |  |  |  | <0.001 |  |
| **Chiba** | 1205(6.6) | 1422(7.8) | 1491(8.2) | 1652(9.1) |  |  |
| **Aichi Cancer Center** | 1224(6.7) | 1254(6.9) | 1284(7.0) | 1466(8.0) |  |  |
| **Okazaki** | 1545(8.5) | 1455(8.0) | 1408(7.7) | 1373(7.5) |  |  |
| **Shizuoka** | 1214(6.7) | 1176(6.5) | 1174(6.4) | 881(4.8) |  |  |
| **Daiko** | 843(4.6) | 1042(5.7) | 1124(6.2) | 1448(7.9) |  |  |
| **Takashima** | 495(2.7) | 458(2.5) | 436(2.4) | 438(2.4) |  |  |
| **Kyoto** | 968(5.3) | 1146(6.3) | 1298(7.1) | 1842(10.1) |  |  |
| **Fukuoka** | 2010(11.0) | 2192(12.0) | 2296(12.6) | 2147(11.8) |  |  |
| **Saga** | 2676(14.7) | 2854(15.7) | 2662(14.6) | 2211(12.1) |  |  |
| **Kagoshima** | 1545(8.5) | 1511(8.3) | 1464(8.0) | 1445(7.9) |  |  |
| **Tokushima** | 646(3.5) | 542(3.0) | 490(2.7) | 497(2.7) |  |  |
| **Kyusyu Okinawa Population Study** | 2329(12.8) | 1921(10.5) | 1932(10.6) | 1882(10.3) |  |  |
| **Shizuoka-Sakuragaoka** | 1534(8.4) | 1262(6.9) | 1177(6.5) | 952(5.2) |  |  |
| a Median(25%, 75%) |  |  |  |  |  |  |
| b Number(%) |  |  |  |  |  |  |
| MET : Metabolic equivalents of task |  |  |  |  |  |  |
| The Kruscal Wallis test for continuous variables. |  |  |  |  |  |  |
| The chi-squared test for categorical variables. |  |  |  |  |  |  |
| Factor 3: saturated fatty acid, calcium, vitamin B2 and low carbohydrate pattern | | | | | |  |

| **Supplementary Table 4. Characteristics of study participants according to quartiles of Factor 4** | | | | | |
| --- | --- | --- | --- | --- | --- |
|  | **Factor4** | | | |  |
|  | **Q1 (n=18235)** | **Q2 (n=18235)** | **Q3 (n=18234)** | **Q4 (n=18235)** | **P-value** |
|  |
| **Age(years)a** | 53.0(45.0, 60.0) | 55.0(46.0, 62.0) | 57.0(48.0, 63.0) | 59.0(52.0, 64.0) | <0.001 |  |
| **Exercise during leisure time**  **(MET-hours/week)a** | 3.9(0.0, 15.3) | 5.1(0.4, 17.0) | 6.5(0.4, 17.9) | 7.7(1.3, 20.0) | <0.001 |  |
| **Energy intake(kcal/day)a** | 1666.3(1470.5, 1918.9) | 1646.6(1480.6, 1880.3) | 1651.9(1487.8, 1868.6) | 1668.3(1500.0, 1892.8) | <0.001 |  |
| **BMI(kg/m²)a** | 22.7(20.8, 25.0) | 22.5(20.7, 24.7) | 22.6(20.7, 24.7) | 22.8(20.8, 24.9) | <0.001 |  |
| **Sexb** |  |  |  |  | <0.001 |  |
| **Male** | 8919(48.9) | 7805(42.8) | 7366(40.4) | 7842(43.0) |  |  |
| **Female** | 9316(51.1) | 10430(57.2) | 10868(59.6) | 10393(57.0) |  |  |
| **Smoking habitb** |  |  |  |  | <0.001 |  |
| **Current** | 3976(21.8) | 3216(17.6) | 2719(14.9) | 2815(15.4) |  |  |
| **Past** | 4143(22.7) | 3899(21.4) | 3779(20.7) | 3894(21.4) |  |  |
| **Non** | 10116(55.5) | 11120(61.0) | 11736(64.4) | 11526(63.2) |  |  |
| **Drinking habitb** |  |  |  |  | <0.001 |  |
| **Current** | 11015(60.4) | 10068(55.2) | 9612(52.7) | 9247(50.7) |  |  |
| **Past** | 356(2.0) | 371(2.0) | 426(2.3) | 535(2.9) |  |  |
| **Non** | 6864(37.6) | 7796(42.8) | 8196(45.0) | 8453(46.4) |  |  |
| **Education level(years)b** |  |  |  |  | <0.001 |  |
| **≤9** | 1229(6.7) | 1067(5.9) | 1101(6.0) | 1479(8.1) |  |  |
| **10~15** | 9270(50.8) | 9291(51.0) | 9244(50.7) | 8681(47.6) |  |  |
| **≥16** | 3932(21.6) | 3933(21.6) | 3589(19.7) | 3146(17.3) |  |  |
| **Unknown** | 3804(20.9) | 3944(21.6) | 4300(23.6) | 4929(27.0) |  |  |
| **Research siteb** |  |  |  |  | <0.001 |  |
| **Chiba** | 1157(6.3) | 1367(7.5) | 1537(8.4) | 1709(9.4) |  |  |
| **Aichi Cancer Center** | 1346(7.4) | 1312(7.2) | 1346(7.4) | 1224(6.7) |  |  |
| **Okazaki** | 1531(8.4) | 1518(8.3) | 1386(7.6) | 1346(7.4) |  |  |
| **Shizuoka** | 1025(5.6) | 1183(6.5) | 1107(6.1) | 1130(6.2) |  |  |
| **Daiko** | 1104(6.1) | 1209(6.6) | 1165(6.4) | 979(5.4) |  |  |
| **Takashima** | 480(2.6) | 439(2.4) | 454(2.5) | 454(2.5) |  |  |
| **Kyoto** | 1581(8.7) | 1470(8.1) | 1260(6.9) | 943(5.2) |  |  |
| **Fukuoka** | 1593(8.7) | 2035(11.2) | 2331(12.8) | 2686(14.7) |  |  |
| **Saga** | 2500(13.7) | 2646(14.5) | 2745(15.1) | 2512(13.8) |  |  |
| **Kagoshima** | 1608(8.8) | 1378(7.6) | 1330(7.3) | 1649(9.0) |  |  |
| **Tokushima** | 811(4.5) | 576(3.2) | 465(2.6) | 323(1.8) |  |  |
| **Kyusyu Okinawa Population Study** | 2141(11.7) | 1843(10.1) | 1910(10.5) | 2170(11.9) |  |  |
| **Shizuoka-Sakuragaoka** | 1358(7.5) | 1259(6.9) | 1198(6.6) | 1110(6.1) |  |  |
| a Median(25%, 75%) |  |  |  |  |  |  |
| b Number(%) |  |  |  |  |  |  |
| MET : Metabolic equivalents of task |  |  |  |  |  |  |
| The Kruscal Wallis test for continuous variables. |  |  |  |  |  |  |
| The chi-squared test for categorical variables. |  |  |  |  |  |  |
| Factor 4: sodium, protein and vitamin D pattern | | | | | |  |

| **Supplementary Table 5. HRs and 95% CIs for the association between Factor 3 and mortalities** | | | | | | |
| --- | --- | --- | --- | --- | --- | --- |
|  |  | **Factor 3** | | | |  |
|  |  | **Q1** | **Q2** | **Q3** | **Q4** | **P for trend** |
|  |  | **HR** | **HR (95% CI)** | **HR (95% CI)** | **HR (95% CI)** |
| **All-cause mortality** | **Participants** | 18234 | 18235 | 18236 | 18234 |  |
| **No. of deaths** | 980 | 857 | 843 | 808 |  |
| **Person-years** | 214947 | 214641 | 215837 | 211373 |  |
| **model 1** | 1(ref) | 0.98 (0.90-1.08) | 0.96 (0.88-1.05) | 1.03 (0.94-1.14) | 0.694 |
| **model 2** | 1(ref) | 1.01 (0.92-1.11) | 1.01 (0.92-1.11) | **1.10 (1.00-1.21)** | 0.076 |
| **CVD mortality** | **Participants** | 18234 | 18235 | 18236 | 18234 |  |
| **No. of deaths** | 145 | 115 | 143 | 100 |  |
| **Person-years** | 214947 | 214641 | 215837 | 211373 |  |
| **model 1** | 1(ref) | 0.90 (0.70-1.15) | 1.11 (0.88-1.39) | 0.88 (0.68-1.13) | 0.261 |
| **model 2** | 1(ref) | 0.94 (0.73-1.20) | 1.19 (0.94-1.50) | 0.96 (0.74-1.25) | 0.312 |
| **Cerebrovascular disease mortality** | **Participants** | 18234 | 18235 | 18236 | 18234 |  |
| **No. of deaths** | 55 | 36 | 50 | 40 |  |
| **Person-years** | 214947 | 214641 | 215837 | 211373 |  |
| **model 1** | 1(ref) | 0.72 (0.47-1.10) | 0.98 (0.67-1.44) | 0.87 (0.58-1.31) | 0.808 |
| **model 2** | 1(ref) | 0.74 (0.49-1.14) | 1.05 (0.71-1.55) | 0.96 (0.63-1.45) | 0.818 |
| **Respiratory disease mortality** | **Participants** | 18234 | 18235 | 18236 | 18234 |  |
| **No. of deaths** | 82 | 55 | 45 | 56 |  |
| **Person-years** | 212635 | 213978 | 214145 | 216039 |  |
| **model 1** | 1(ref) | 0.80 (0.57-1.12) | **0.64 (0.44-0.92)** | 0.90 (0.64-1.27) | 0.252 |
| **model 2** | 1(ref) | 0.86 (0.61-1.22) | 0.72 (0.50-1.04) | 1.04 (0.74-1.48) | 0.787 |
| **Cancer mortality** | **Participants** | 18234 | 18235 | 18236 | 18234 |  |
| **No. of deaths** | 541 | 481 | 466 | 478 |  |
| **Person-years** | 214947 | 214641 | 215837 | 211373 |  |
| **model 1** | 1(ref) | 0.99 (0.88-1.12) | 0.95 (0.84-1.08) | 1.09 (0.96-1.23) | 0.313 |
| **model 2** | 1(ref) | 1.00 (0.89-1.13) | 0.99 (0.87-1.12) | 1.13 (1.00-1.28) | 0.099 |
| Model 1: Adjusted for age, sex and research sites. Model 2: Adjusted for valuables in model 1 plus drinking and smoking habits, total energy intake, physical activity, educational level and BMI. Factor 3: saturated fatty acid, calcium, vitamin B2 and low carbohydrate pattern | | | | | | |

| **Supplementary Table 6. HRs and 95% CIs for the association between Factor 4 and mortalities** | | | | | | |
| --- | --- | --- | --- | --- | --- | --- |
|  |  | **Factor 4** | | | |  |
|  |  | **Q1** | **Q2** | **Q3** | **Q4** | **P for trend** |
|  |  | **HR** | **HR (95% CI)** | **HR (95% CI)** | **HR (95% CI)** |
| **All-cause mortality** | **Participants** | 18235 | 18235 | 18234 | 18235 |  |
| **No. of deaths** | 804 | 752 | 887 | 1045 |  |
| **Person-years** | 209926 | 212965 | 215553 | 218353 |  |
| **model 1** | 1(ref) | **0.87 (0.79-0.96)** | 0.92 (0.84-1.02) | **0.90 (0.82-0.99)** | 0.103 |
| **model 2** | 1(ref) | **0.88 (0.80-0.98)** | 0.96 (0.87-1.05) | 0.92 (0.84-1.01) | 0.266 |
| **CVD mortality** | **Participants** | 18235 | 18235 | 18234 | 18235 |  |
| **No. of deaths** | 109 | 103 | 147 | 144 |  |
| **Person-years** | 209926 | 212965 | 215553 | 218353 |  |
| **model 1** | 1(ref) | 0.88 (0.67-1.15) | 1.10 (0.86-1.42) | 0.89 (0.69-1.14) | 0.679 |
| **model 2** | 1(ref) | 0.90 (0.69-1.18) | 1.16 (0.90-1.49) | 0.92 (0.71-1.18) | 0.882 |
| **Cerebrovascular disease mortality** | **Participants** | 18235 | 18235 | 18234 | 18235 |  |
| **No. of deaths** | 36 | 39 | 52 | 54 |  |
| **Person-years** | 209926 | 212965 | 215553 | 218353 |  |
| **model 1** | 1(ref) | 1.02 (0.65-1.61) | 1.23 (0.80-1.88) | 1.08 (0.71-1.66) | 0.574 |
| **model 2** | 1(ref) | 1.06 (0.67-1.67) | 1.31 (0.85-2.01) | 1.15 (0.75-1.76) | 0.410 |
| **Respiratory disease mortality** | **Participants** | 18235 | 18235 | 18234 | 18235 |  |
| **No. of deaths** | 47 | 58 | 47 | 86 |  |
| **Person-years** | 209926 | 212965 | 215553 | 218353 |  |
| **model 1** | 1(ref) | 1.11 (0.75-1.63) | 0.77 (0.51-1.15) | 1.08 (0.75-1.54) | 1.000 |
| **model 2** | 1(ref) | 1.11 (0.75-1.63) | 0.80 (0.53-1.20) | 1.11 (0.77-1.59) | 0.865 |
| **Cancer mortality** | **Participants** | 18235 | 18235 | 18234 | 18235 |  |
| **No. of deaths** | 458 | 424 | 498 | 586 |  |
| **Person-years** | 209926 | 212965 | 215553 | 218353 |  |
| **model 1** | 1(ref) | **0.86 (0.75-0.98)** | 0.93 (0.82-1.05) | 0.91 (0.80-1.03) | 0.325 |
| **model 2** | 1(ref) | 0.88 (0.77-1.00) | 0.96 (0.85-1.09) | 0.93 (0.82-1.05) | 0.567 |
| Model 1: Adjusted for age, sex and research sites. Model 2: Adjusted for valuables in model 1 plus drinking and smoking habits, total energy intake, physical activity, educational level and BMI. Factor 4: sodium, protein, and vitamin D pattern | | | | | | |

| **Supplementary Table 7. HRs and 95% CIs for the association between Factor 1 and mortalities handling subjects who died within 2 years as censored** | | | | | | |
| --- | --- | --- | --- | --- | --- | --- |
|  |  | **Factor 1** | | | |  |
|  |  | **Q1** | **Q2** | **Q3** | **Q4** | **P for trend** |
|  |  | **HR** | **HR (95% CI)** | **HR (95% CI)** | **HR (95% CI)** |
| **All-cause mortality** | **Participants** | 18235 | 18234 | 18236 | 18234 |  |
| **No. of deaths** | 864 | 753 | 804 | 788 |  |
| **Person-years** | 206483 | 212335 | 215933 | 222046 |  |
| **model 1** | 1(ref) | **0.80 (0.72-0.88)** | **0.79 (0.72-0.88)** | **0.71 (0.64-0.79)** | **<0.001** |
| **model 2** | 1(ref) | **0.84 (0.76-0.93)** | **0.87 (0.78-0.96)** | **0.80 (0.72-0.89)** | **<0.001** |
| **CVD mortality** | **Participants** | 18235 | 18234 | 18236 | 18234 |  |
| **No. of deaths** | 130 | 116 | 120 | 116 |  |
| **Person-years** | 206483 | 212335 | 215933 | 222046 |  |
| **model 1** | 1(ref) | **0.76 (0.59-0.98)** | **0.69 (0.53-0.89)** | **0.57 (0.44-0.75)** | **<0.001** |
| **model 2** | 1(ref) | 0.81 (0.63-1.04) | **0.76 (0.59-0.99)** | **0.65 (0.49-0.86)** | **0.003** |
| **Cerebrovascular disease mortality** | **Participants** | 18235 | 18234 | 18236 | 18234 |  |
| **No. of deaths** | 44 | 39 | 48 | 38 |  |
| **Person-years** | 206483 | 212335 | 215933 | 222046 |  |
| **model 1** | 1(ref) | 0.73 (0.47-1.13) | 0.76 (0.50-1.17) | **0.50 (0.32-0.81)** | **0.008** |
| **model 2** | 1(ref) | 0.78 (0.50-1.21) | 0.84 (0.54-1.29) | **0.58 (0.36-0.94)** | **0.045** |
| **Respiratory disease mortality** | **Participants** | 18235 | 18234 | 18236 | 18234 |  |
| **No. of deaths** | 61 | 44 | 67 | 59 |  |
| **Person-years** | 206483 | 212335 | 215933 | 222046 |  |
| **model 1** | 1(ref) | **0.64 (0.43-0.94)** | 0.89 (0.62-1.27) | 0.72 (0.49-1.05) | 0.284 |
| **model 2** | 1(ref) | 0.68(0.46-1.01) | 0.96 (0.67-1.37) | 0.79 (0.54-1.18) | 0.581 |
| **Cancer mortality** | **Participants** | 18235 | 18234 | 18236 | 18234 |  |
| **No. of deaths** | 475 | 424 | 434 | 417 |  |
| **Person-years** | 206483 | 212335 | 215933 | 222046 |  |
| **model 1** | 1(ref) | **0.84 (0.74-0.96)** | **0.83 (0.72-0.95)** | **0.76 (0.66-0.87)** | **<0.001** |
| **model 2** | 1(ref) | 0.90 (0.78-1.02) | 0.91 (0.79-1.04) | **0.86 (0.74-0.99)** | 0.064 |
| Model 1: Adjusted for age, sex and research sites. Model 2: Adjusted for valuables in model 1 plus drinking and smoking habits, total energy intake, physical activity, educational level and BMI. Factor 1: folate, carotene, fiber, vitamin C, potassium, iron and retinol pattern | | | | | | |

| **Supplementary Table 8. HRs and 95% CIs for the association between Factor 2 and mortalities handling subjects who died within 2 years as censored** | | | | | | |
| --- | --- | --- | --- | --- | --- | --- |
|  |  | **Factor 2** | | | |  |
|  |  | **Q1** | **Q2** | **Q3** | **Q4** | **P for trend** |
|  |  | **HR** | **HR (95% CI)** | **HR (95% CI)** | **HR (95% CI)** |
| **All-cause mortality** | **Participants** | 18234 | 18236 | 18234 | 18235 |  |
| **No. of deaths** | 1045 | 738 | 733 | 693 |  |
| **Person-years** | 212635 | 213978 | 214145 | 216039 |  |
| **model 1** | 1(ref) | **0.84 (0.77-0.93)** | 0.93 (0.85-1.03) | 0.97 (0.88-1.07) | 0.652 |
| **model 2** | 1(ref) | **0.85 (0.77-0.93)** | 0.94 (0.85-1.03) | 0.96 (0.87-1.05) | 0.529 |
| **CVD mortality** | **Participants** | 18234 | 18236 | 18234 | 18235 |  |
| **No. of deaths** | 137 | 111 | 116 | 118 |  |
| **Person-years** | 212635 | 213978 | 214145 | 216039 |  |
| **model 1** | 1(ref) | 0.94 (0.73-1.21) | 1.05 (0.82-1.34) | 1.14 (0.88-1.46) | 0.261 |
| **model 2** | 1(ref) | 0.95 (0.74-1.22) | 1.06 (0.83-1.36) | 1.12 (0.87-1.45) | 0.295 |
| **Cerebrovascular disease mortality** | **Participants** | 18234 | 18236 | 18234 | 18235 |  |
| **No. of deaths** | 36 | 42 | 39 | 52 |  |
| **Person-years** | 212635 | 213978 | 214145 | 216039 |  |
| **model 1** | 1(ref) | 1.28 (0.82-2.00) | 1.21 (0.77-1.92) | **1.66 (1.07-2.56)** | **0.034** |
| **model 2** | 1(ref) | 1.28 (0.82-2.01) | 1.24 (0.78-1.95) | **1.70 (1.10-2.63)** | **0.025** |
| **Respiratory disease mortality** | **Participants** | 18234 | 18236 | 18234 | 18235 |  |
| **No. of deaths** | 79 | 66 | 45 | 41 |  |
| **Person-years** | 212635 | 213978 | 214145 | 216039 |  |
| **model 1** | 1(ref) | 1.05 (0.76-1.46) | 0.80 (0.55-1.15) | 0.79 (0.53-1.16) | 0.119 |
| **model 2** | 1(ref) | 1.08 (0.78-1.50) | 0.84 (0.58-1.21) | 0.84 (0.57-1.23) | 0.224 |
| **Cancer mortality** | **Participants** | 18234 | 18236 | 18234 | 18235 |  |
| **No. of deaths** | 581 | 402 | 393 | 374 |  |
| **Person-years** | 212635 | 213978 | 214145 | 216039 |  |
| **model 1** | 1(ref) | **0.83 (0.73-0.95)** | 0.92 (0.81-1.05) | 0.98 (0.86-1.12) | 0.832 |
| **model 2** | 1(ref) | **0.83 (0.73-0.94)** | 0.92 (0.80-1.04) | 0.95 (0.83-1.09) | 0.556 |
| Model 1: Adjusted for age, sex and research sites. Model 2: Adjusted for valuables in model 1 plus drinking and smoking habits, total energy intake, physical activity, educational level and BMI. Factor 2: unsaturated fatty acid and vitamin E pattern | | | | | | |

| **Supplementary Table 9. HRs and 95% CIs for the association between Factor 3 and mortalities handling subjects who died within 2 years as censored** | | | | | | |
| --- | --- | --- | --- | --- | --- | --- |
|  |  | **Factor 3** | | | |  |
|  |  | **Q1** | **Q2** | **Q3** | **Q4** | **P for trend** |
|  |  | **HR** | **HR (95% CI)** | **HR (95% CI)** | **HR (95% CI)** |
| **All-cause mortality** | **Participants** | 18234 | 18235 | 18236 | 18234 |  |
| **No. of deaths** | 900 | 797 | 777 | 735 |  |
| **Person-years** | 214947 | 214641 | 215837 | 211373 |  |
| **model 1** | 1(ref) | 1.00 (0.91-1.10) | 0.96 (0.88-1.06) | 1.03 (0.93-1.13) | 0.821 |
| **model 2** | 1(ref) | 1.02 (0.93-1.13) | 1.01 (0.92-1.12) | 1.09 (0.99-1.21) | 0.130 |
| **CVD mortality** | **Participants** | 18234 | 18235 | 18236 | 18234 |  |
| **No. of deaths** | 139 | 111 | 139 | 93 |  |
| **Person-years** | 214947 | 214641 | 215837 | 211373 |  |
| **model 1** | 1(ref) | 0.91 (0.71-1.16) | 1.12 (0.89-1.42) | 0.85 (0.66-1.11) | 0.639 |
| **model 2** | 1(ref) | 0.95 (0.74-1.22) | 1.21 (0.95-1.53) | 0.94 (0.72-1.23) | 0.762 |
| **Cerebrovascular disease mortality** | **Participants** | 18234 | 18235 | 18236 | 18234 |  |
| **No. of deaths** | 50 | 34 | 47 | 38 |  |
| **Person-years** | 214947 | 214641 | 215837 | 211373 |  |
| **model 1** | 1(ref) | 0.75 (0.49-1.16) | 1.02 (0.68-1.52) | 0.92 (0.60-1.41) | 1.000 |
| **model 2** | 1(ref) | 0.78 (0.50-1.21) | 1.10 (0.74-1.65) | 1.03 (0.67-1.58) | 0.583 |
| **Respiratory disease mortality** | **Participants** | 18234 | 18235 | 18236 | 18234 |  |
| **No. of deaths** | 78 | 54 | 44 | 55 |  |
| **Person-years** | 212635 | 213978 | 214145 | 216039 |  |
| **model 1** | 1(ref) | 0.82 (0.58-1.17) | **0.65 (0.45-0.95)** | 0.93 (0.66-1.32) | 0.351 |
| **model 2** | 1(ref) | 0.89 (0.63-1.26) | 0.74 (0.51-1.07) | 1.08 (0.76-1.54) | 0.938 |
| **Cancer mortality** | **Participants** | 18234 | 18235 | 18236 | 18234 |  |
| **No. of deaths** | 480 | 438 | 412 | 420 |  |
| **Person-years** | 214947 | 214641 | 215837 | 211373 |  |
| **model 1** | 1(ref) | 1.02 (0.89-1.16) | 0.95 (0.83-1.08) | 1.08 (0.95-1.24) | 0.466 |
| **model 2** | 1(ref) | 1.02 (0.90-1.17) | 0.98 (0.86-1.12) | 1.12 (0.98-1.28) | 0.195 |
| Model 1: Adjusted for age, sex and research sites. Model 2: Adjusted for valuables in model 1 plus drinking and smoking habits, total energy intake, physical activity, educational level and BMI. Factor 3: saturated fatty acid, calcium, vitamin B2 and low carbohydrate pattern | | | | | | |

| **Supplementary Table 10. HRs and 95% CIs for the association between Factor 4 and mortalities handling subjects who died within 2 years as censored** | | | | | | |
| --- | --- | --- | --- | --- | --- | --- |
|  |  | **Factor 4** | | | |  |
|  |  | **Q1** | **Q2** | **Q3** | **Q4** | **P for trend** |
|  |  | **HR** | **HR (95% CI)** | **HR (95% CI)** | **HR (95% CI)** |
| **All-cause mortality** | **Participants** | 18235 | 18235 | 18234 | 18235 |  |
| **No. of deaths** | 728 | 693 | 823 | 965 |  |
| **Person-years** | 209926 | 212965 | 215553 | 218353 |  |
| **model 1** | 1(ref) | **0.88(0.79-0.97)** | 0.93 (0.84-1.03) | **0.90 (0.82-0.99)** | 0.135 |
| **model 2** | 1(ref) | **0.89 (0.81-0.99)** | 0.97 (0.88-1.07) | 0.92 (0.84-1.02) | 0.323 |
| **CVD mortality** | **Participants** | 18235 | 18235 | 18234 | 18235 |  |
| **No. of deaths** | 104 | 102 | 141 | 135 |  |
| **Person-years** | 209926 | 212965 | 215553 | 218353 |  |
| **model 1** | 1(ref) | 0.91 (0.69-1.19) | 1.10 (0.85-1.42) | 0.86 (0.66-1.11) | 0.469 |
| **model 2** | 1(ref) | 0.93 (0.71-1.23) | 1.16 (0.90-1.50) | 0.89 (0.69-1.16) | 0.665 |
| **Cerebrovascular disease mortality** | **Participants** | 18235 | 18235 | 18234 | 18235 |  |
| **No. of deaths** | 32 | 38 | 49 | 50 |  |
| **Person-years** | 209926 | 212965 | 215553 | 218353 |  |
| **model 1** | 1(ref) | 1.12 (0.70-1.79) | 1.29 (0.83-2.03) | 1.12 (0.71-1.76) | 0.561 |
| **model 2** | 1(ref) | 1.17 (0.73-1.87) | 1.39 (0.88-2.18) | 1.20 (0.76-1.88) | 0.377 |
| **Respiratory disease mortality** | **Participants** | 18235 | 18235 | 18234 | 18235 |  |
| **No. of deaths** | 45 | 56 | 46 | 84 |  |
| **Person-years** | 209926 | 212965 | 215553 | 218353 |  |
| **model 1** | 1(ref) | 1.11 (0.75-1.65) | 0.78 (0.52-1.18) | 1.09 (0.76-1.57) | 0.944 |
| **model 2** | 1(ref) | 1.11 (0.75-1.65) | 0.81 (0.53-1.22) | 1.12 (0.77-1.61) | 0.865 |
| **Cancer mortality** | **Participants** | 18235 | 18235 | 18234 | 18235 |  |
| **No. of deaths** | 400 | 378 | 446 | 526 |  |
| **Person-years** | 209926 | 212965 | 215553 | 218353 |  |
| **model 1** | 1(ref) | 0.87 (0.76-1.00) | 0.94 (0.82-1.07) | 0.92 (0.81-1.05) | 0.450 |
| **model 2** | 1(ref) | 0.89 (0.77-1.02) | 0.97 (0.85-1.12) | 0.94 (0.83-1.08) | 0.706 |
| Model 1: Adjusted for age, sex and research sites. Model 2: Adjusted for valuables in model 1 plus drinking and smoking habits, total energy intake, physical activity, educational level and BMI. Factor 4: sodium, protein and vitamin D pattern | | | | | | |
